# Supplementary material for: Preparation of a novel violet-excitable Na3YSi2O7:Eu2+ green phosphor via salt-flux assistance and its luminescence properties
Source: Royal Society of Chemistry journal article supplement (doi:10.1039/d4tc00906a), 2024-01-01
Supplement: d4tc00906a1.pdf [file d4tc00906a1.pdf]

## **Supporting Information**

### **Preparation of a novel violet-excitable $\text{Na}_3\text{YSi}_2\text{O}_7:\text{Eu}^{2+}$ green phosphor via salt-flux assistance and its luminescence properties**

Jinqing Gao,<sup>a</sup> Langping Dong,<sup>a\*</sup> Yandan Lin,<sup>b</sup> Pengcheng Zhou,<sup>c</sup> Xianchao Ma,<sup>d</sup>

Jingshan Hou,<sup>a\*</sup> and Yongzheng Fang<sup>a\*</sup>

<sup>a</sup> *School of Materials Science and Engineering, Shanghai Institute of Technology, Shanghai, 201418, China.*

<sup>b</sup> *Institute for Electric Light Sources, School of Information Science and Technology, Fudan University, Shanghai 200438, P.R. China.*

<sup>c</sup> *Shanghai Aviation Electric Co., Ltd, Shanghai, 201101, China.*

<sup>d</sup> *Commercial Aircraft Corporation of China Ltd, Shanghai Aircraft Design & Research Institute, Shanghai 201210, P.R. China.*

\*Corresponding author. *E-mail address:* [lpdong@sit.edu.cn](mailto:lpdong@sit.edu.cn) (L. P. D.);

[hujingshan@hotmail.com](mailto:hujingshan@hotmail.com) (J. S. H.); [fyz1003@sina.com](mailto:fyz1003@sina.com) (Y. Z. F.).

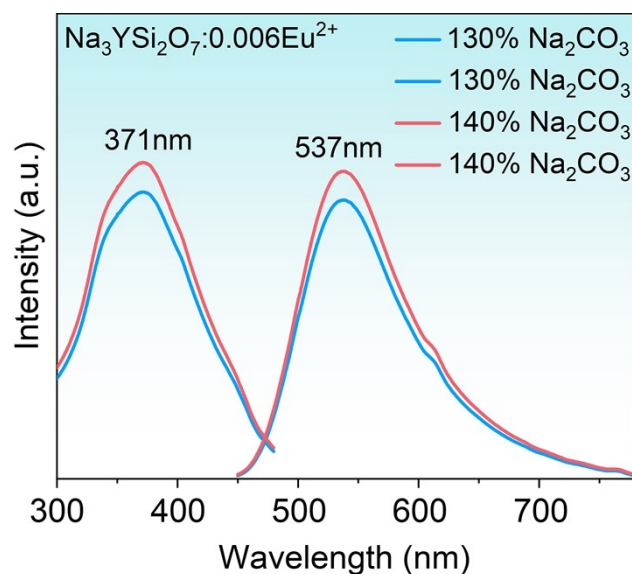

**Fig. S1** Spectral comparison of the  $\text{Na}_3\text{YSi}_2\text{O}_7:0.006\text{Eu}^{2+}$  sample at the formulation of 130% and 140%  $\text{Na}_2\text{CO}_3$ .

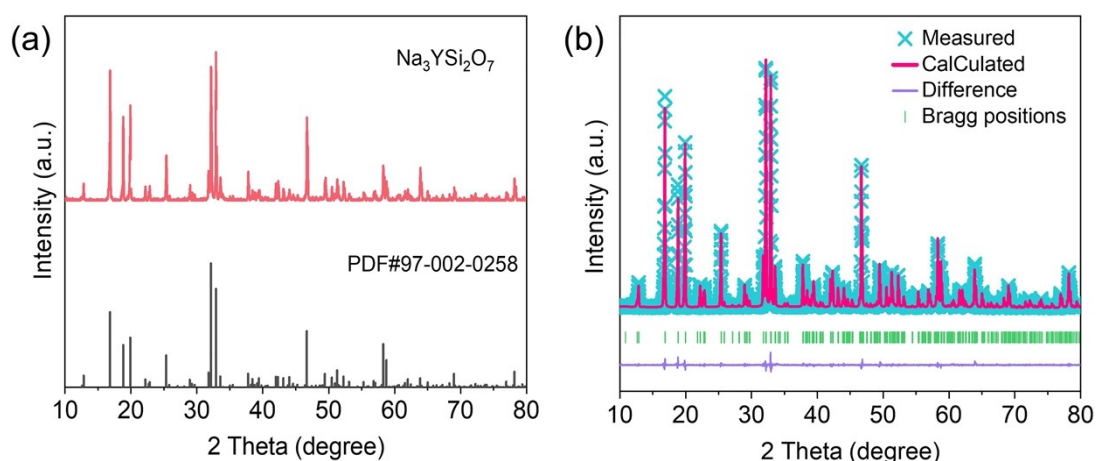

**Fig. S2** XRD and Rietveld refinement patterns of the  $\text{Na}_3\text{YSi}_2\text{O}_7$  matrix.

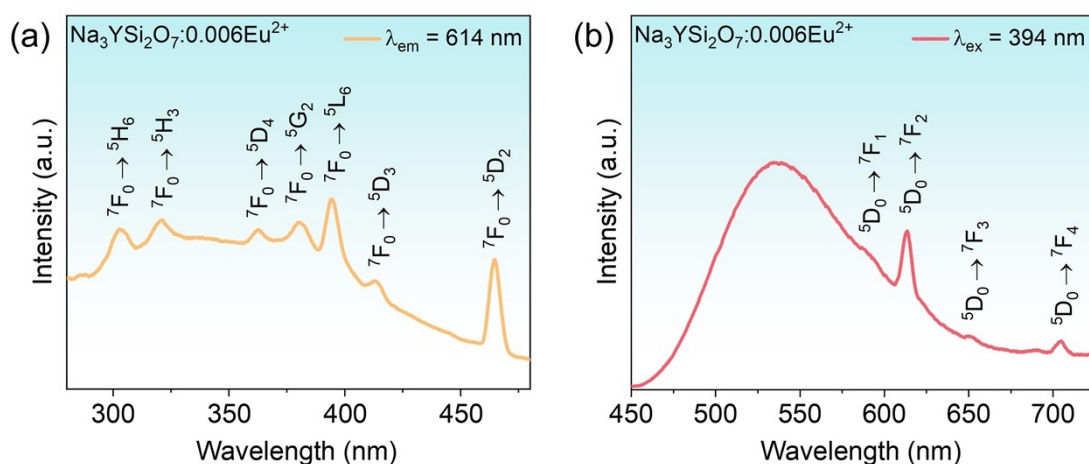

**Fig. S3** (a) Excitation spectrum of the emission at 614 nm. (b) Emission spectrum of the excitation at 394 nm.

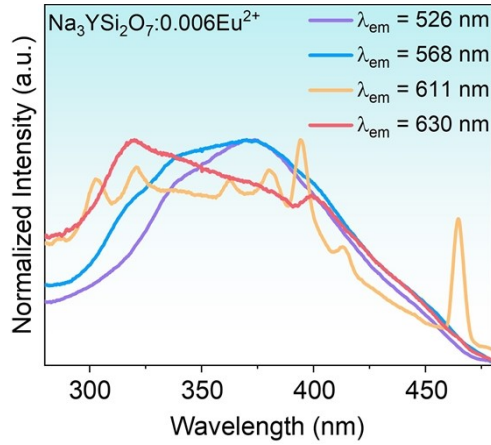

**Fig. S4** Excitation spectra detected at 526, 568, 611 and 630 nm, respectively.

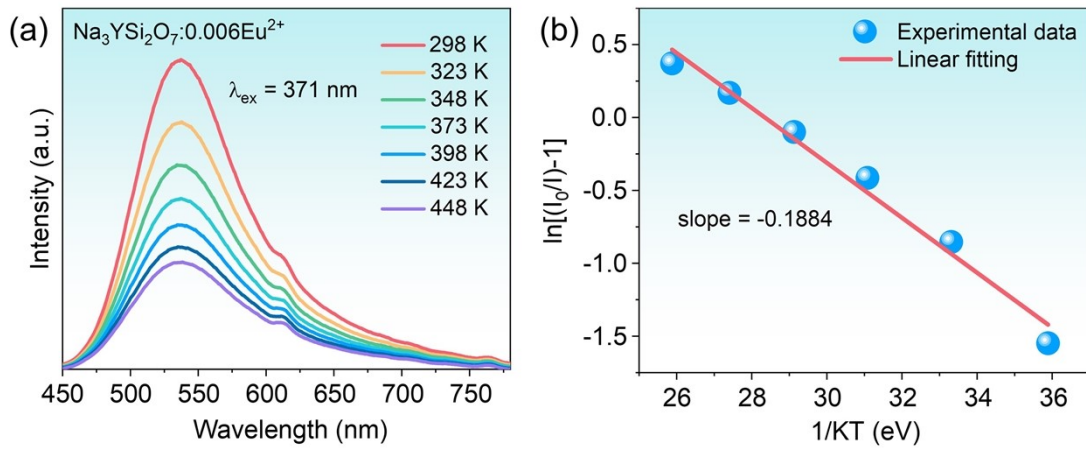

**Fig. S5** (a) Temperature-dependent PL spectra of  $\text{Na}_3\text{YSi}_2\text{O}_7:0.006\text{Eu}^{2+}$  phosphor, ( $\lambda_{\text{ex}} = 371 \text{ nm}$ ). (b) Relationship of  $\ln((I_0/I)-1)$  versus  $1/kT$ .

## Photoluminescence Quantum Yield

Photoluminescence Quantum Yield is an important parameter to evaluate the luminescence property of phosphors. The PLQY of the sample was measured using the fluorescence spectrophotometer (Hitachi F-7000), which additionally includes an integrating sphere (F-3018). According to the method described by L.A. Moreno.<sup>S1</sup> Briefly, the method allows determining the sample PLQY by measuring the ratio between the numbers of photons emitted ( $N_{em}$ ) and the number of those absorbed ( $N_{abs}$ ) by the sample using the relation:

$$PLQY = \frac{N_{em}}{N_{abs}} = \varphi_d - (1 - A_d)\varphi_i$$

Where  $\varphi_d$  is the measured internal quantum yield which refers to the ratio of the amount of fluorescence to that of the excitation beam absorbed by the sample,  $A_d$  is the measured absorbance which means the ratio of the amount of excitation beam absorbed by the sample, and  $\varphi_i$  is the quantum yield attributed to re-excitation. Based on this theory, the measured PLQY of  $\text{Na}_3\text{YSi}_2\text{O}_7:\text{Eu}^{2+}$  phosphor is 18.5%.

## References

S1 L. A. Moreno, J. Vis. Exp., 2012, **63**, 3066.
